# Supplementary material for: Controlled Delivery of an Anti-Inflammatory Toxin to Macrophages by Mutagenesis and Nanoparticle Modification
Source: MDPI journal article supplement (doi:10.3390/nano12132161), 2022-06-23
Supplement: s1 [file s1]

## Supplementary Material

# Controlled Delivery of an Anti-Inflammatory Toxin to Macrophages by Mutagenesis and Nanoparticle Modification

Ayaka Harada <sup>1,†</sup>, Hiroyasu Tsutsuki <sup>2,†</sup>, Tianli Zhang <sup>2</sup>, Kinnosuke Yahiro <sup>3</sup>, Tomohiro Sawa <sup>2</sup> and Takuro Niidome <sup>1,\*</sup>

<sup>1</sup> Faculty of Advanced Science and Technology, Kumamoto University, 2-39-1 Kurokami, Chuo-ku, Kumamoto 860-8555, Japan; 201d8604@st.kumamoto-u.ac.jp

<sup>2</sup> Department of Microbiology, Graduate School of Medical Sciences, Kumamoto University, 1-1-1 Honjo, Chuo-ku, Kumamoto 860-8556, Japan; tsutsuki@kumamoto-u.ac.jp (H.T.); zhangtianli220@hotmail.com (T.Z.); sawat@kumamoto-u.ac.jp (T.S.)

<sup>3</sup> Department of Microbiology and Infection Control Sciences, Kyoto Pharmaceutical University, 5 Misasagi-Nakauchi-cho, Yamashina-ku, Kyoto 607-8414, Japan; kin816tas@mb.kyoto-phu.ac.jp

\* Correspondence: niidome@kumamoto-u.ac.jp

† These authors contributed equally to this work.

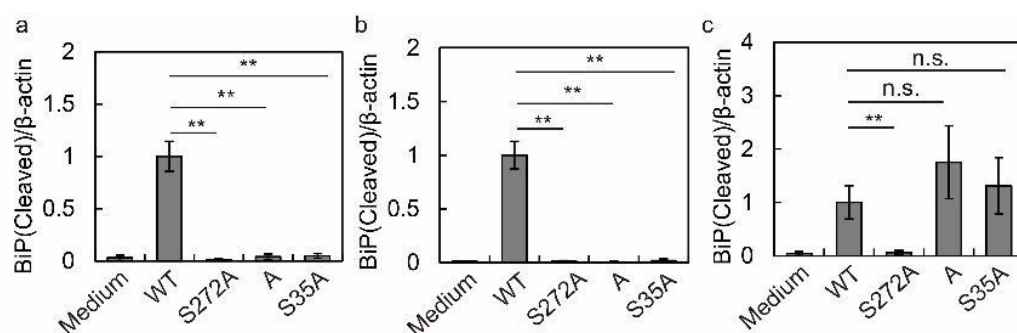

**Figure S1.** Densitometry of BiP cleavage in (a) J774.1 cells, (b) HeLa cells, and (c) a HeLa cell lysate. The cells and cell lysate were treated with 5  $\mu\text{g/mL}$  toxin for 1 h. After treatment, the cells and cell lysate were incubated in SDS sample buffer and then subjected to Western blotting and densitometry. Data are expressed as means  $\pm$  S.D. ( $n = 3$ ). Statistical analyses were performed using Student's  $t$ -test. n.s., not significant.  $**p < 0.01$ .

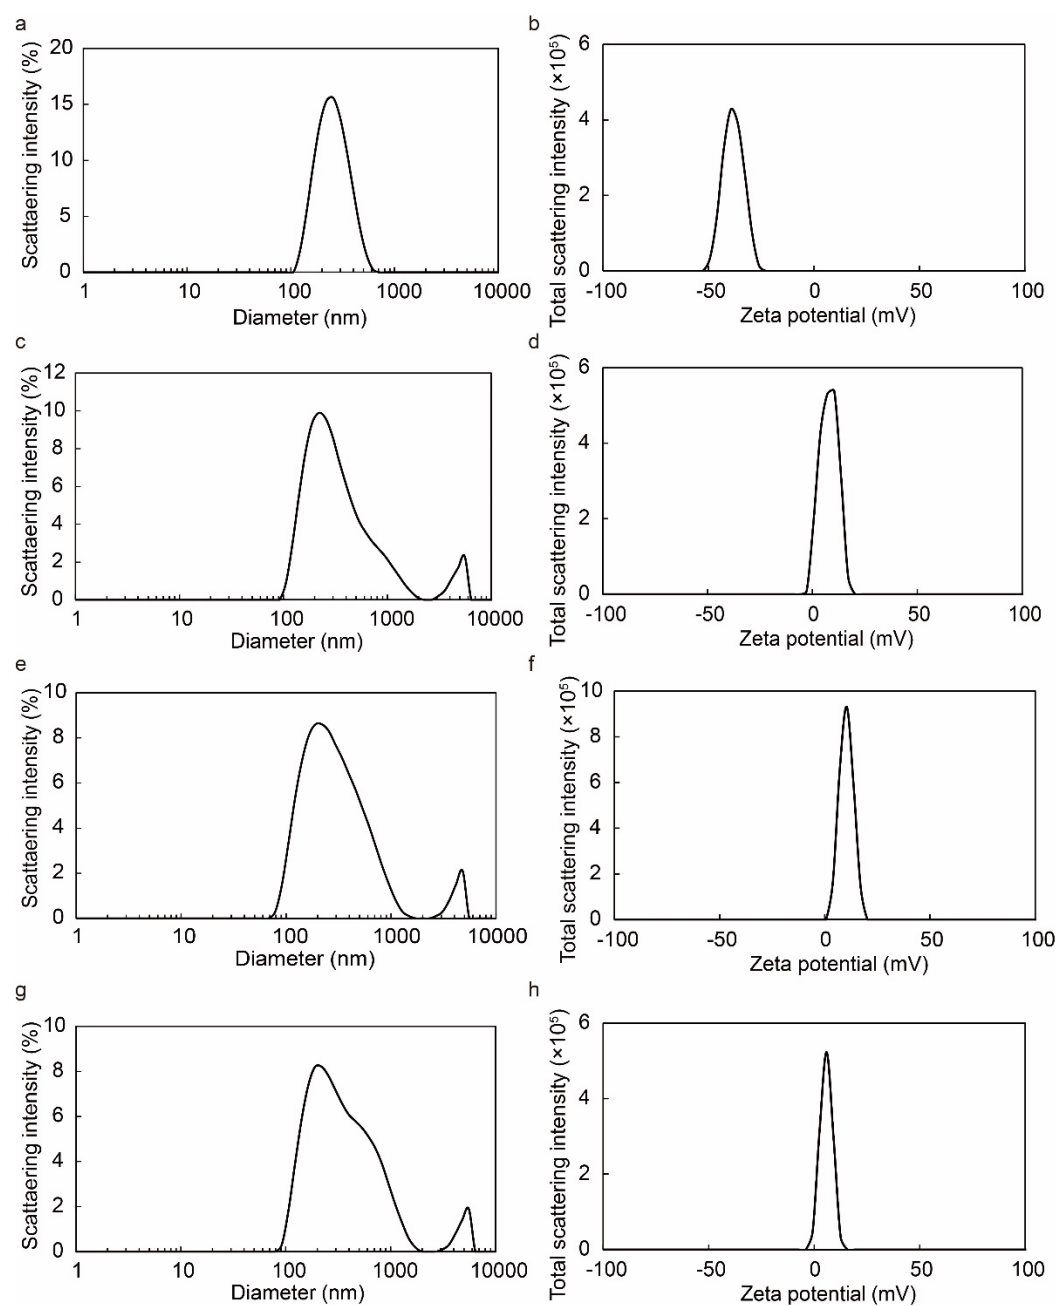

**Figure S2.** Characterization of PLGA NPs. Dynamic light scattering of (a) PLGA NPs, (c) WT-PLGA NPs, (e) A-PLGA NPs and (g) S35A-PLGA NPs in water. Zeta potentials of (b) PLGA NPs, (d) WT-PLGA NPs, (f) A-PLGA NPs and (h) S35A-PLGA NPs were measured at room temperature.

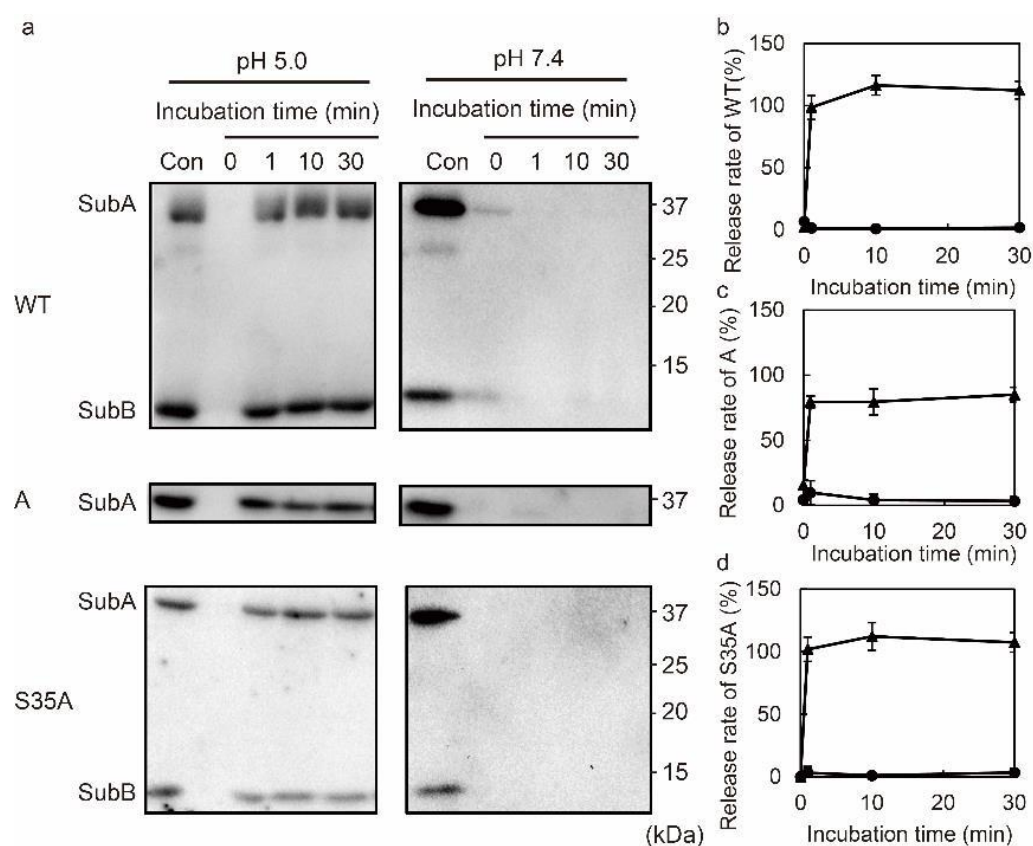

**Figure S3.** pH-responsive dissociation of His-tagged WT, A, and S35A from PLGANPs. (a) Toxin-modified PLGA NPs were treated for 0–30 min with buffers at the indicated pH value. After centrifugation, the supernatant was analyzed by Western blotting and densitometry. Quantification of released (b) WT, (c) A, and (d) S35A by densitometry (●: pH 5.0; ▲: pH 7.4). Data are expressed as means  $\pm$  S.D. (n = 3).

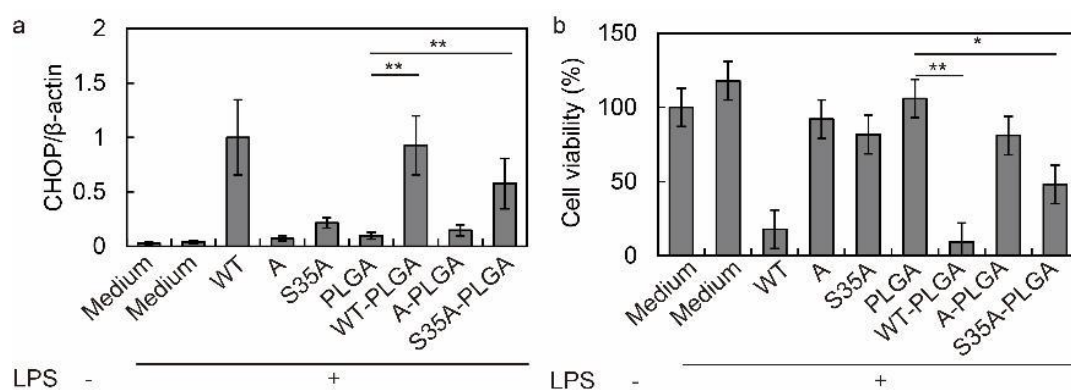

**Figure S4.** Evaluation of ER stress and cytotoxicity in J774.1 cells. The cells were treated with or without LPS (100 ng/mL) in the presence 5  $\mu$ g/mL toxin and 20  $\mu$ g/mL PLGA NPs for 8 and 24 h. After 8 h, the cells were lysed in SDS sample buffer and then subjected to Western blotting and densitometry. Additionally, the cells were subjected to MTT assays at 24 h of treatment. (a) Densitometry of CHOP expression at 8 h. (b) Evaluation of cell viability by MTT assays. Data are expressed as means  $\pm$  S.D. (n = 3). Statistical analyses were performed using Student's t-test. \* $p$  < 0.05, \*\* $p$  < 0.01.

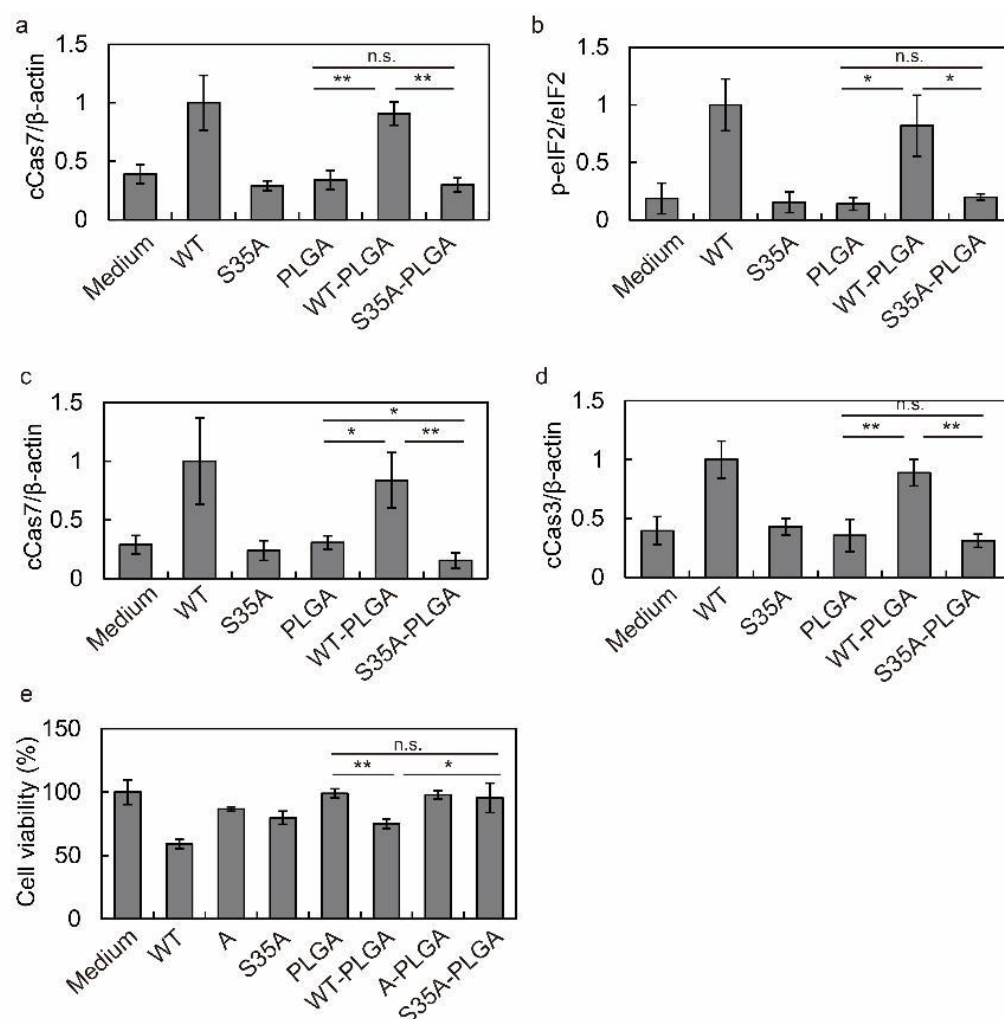

**Figure S5.** Evaluation of ER stress and apoptosis induction in HeLa cells. The cells were treated with or without 5  $\mu\text{g/mL}$  toxin and 20  $\mu\text{g/mL}$  PLGA NPs for 3, 8, and 24 h. After 3 and 8 h, the cells were lysed in SDS sample buffer and subjected to Western blotting and densitometry. Additionally, cell viability was evaluated by MTT assays at 24 h of treatment. (a) Densitometry of caspase 7 activation at 3 h. (b) Densitometry of eIF2 phosphorylation at 3 h. (c) Densitometry of caspase 7 activation at 8 h. (d) Densitometry of caspase 3 activation at 8 h. (e) Evaluation of cell viability by MTT assays. Data are expressed as means  $\pm$  S.D. ( $n = 3$ ). Statistical analyses were performed using Student's t-test. n.s., not significant. \* $p < 0.05$ , \*\* $p < 0.01$ .
